# Supplementary material for: Three-dimensional electric micro-grid networks for high-energy-density lithium-ion battery cathodes
Source: Royal Society of Chemistry journal article supplement (doi:10.1039/c7ta05042a), 2017-01-01
Supplement: c7ta05042a1.pdf [file c7ta05042a1.pdf]

## Supporting information

# **Three-Dimensional Electric Micro-Grid Network for High-Energy-Density Lithium-Ion Battery Cathodes**

Dae-wook Kim<sup>a</sup>, Nobuyuki Zettsu<sup>ab</sup>, and Katsuya Teshima<sup>\*ab</sup>

<sup>a</sup>Department of Materials Chemistry, School of Engineering, Shinshu University, 4-17-1 Wakasato, Nagano 380-8553, Japan

<sup>b</sup>Center for Energy and Environmental Science, Shinshu University, 4-17-1 Wakasato, Nagano 380-8553, Japan

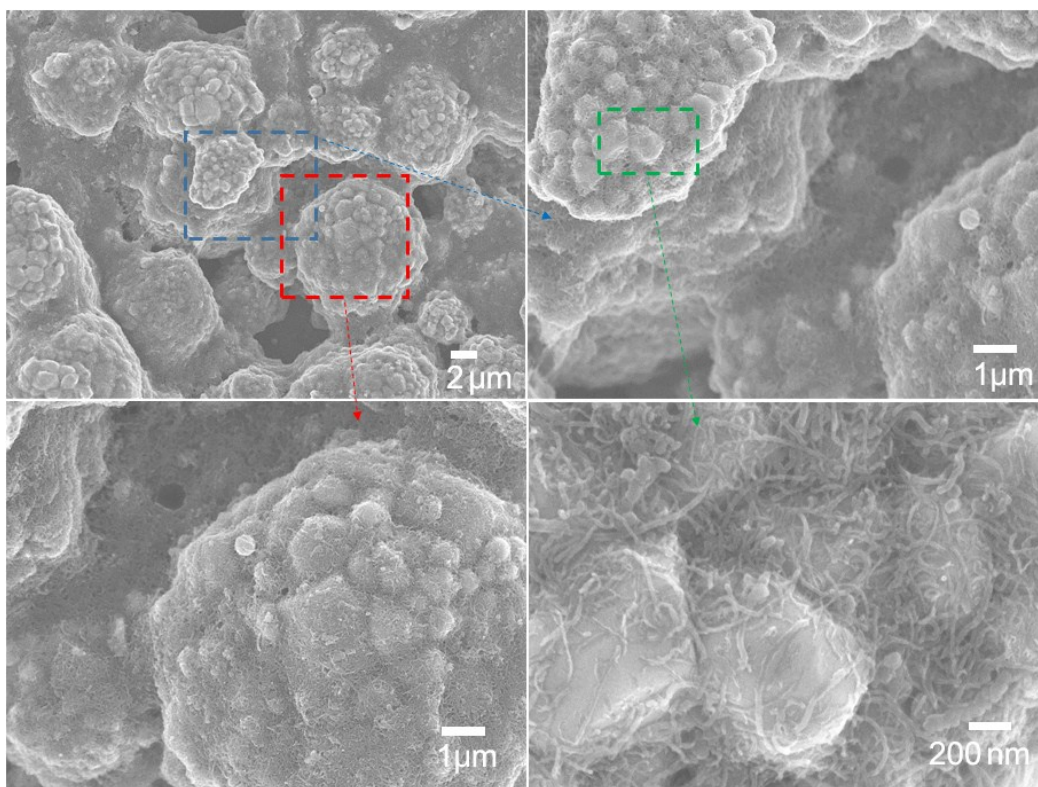

Fig. S1 FE-SEM images of the CNT/NCM95 composite electrode surface.

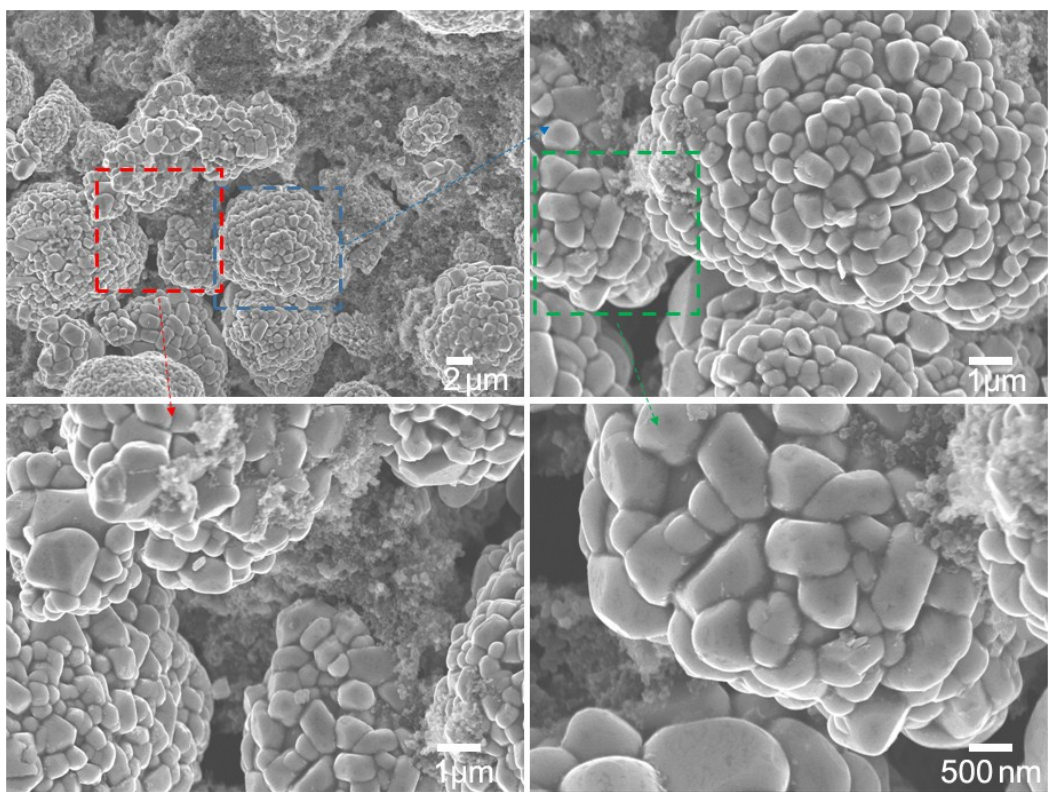

Fig. S2. FE-SEM images of the ABs/NCM electrode surface.

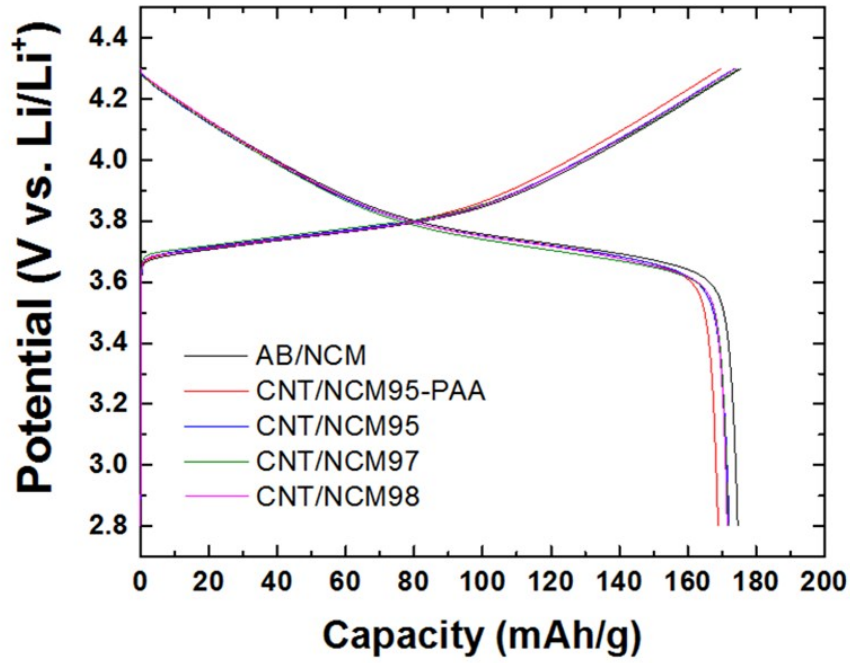

Fig. S3 Galvanostatic charge–discharge curves for the MW-CNT/NCM523 composite electrodes and ABs/NCM523 electrode; the capacities are based on the mass of NCM523

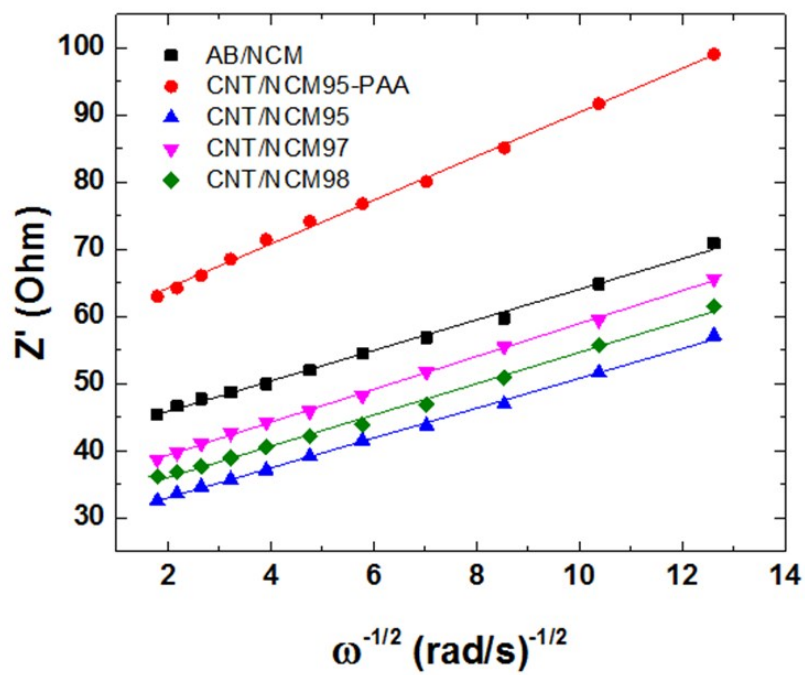

Fig. S4 Plots of  $Z'$  vs  $\omega^{-1/2}$  in the low-frequency region of the EIS spectra recorded for the MW-CNT/NCM523 composite electrodes and ABs/NCM523 electrode.

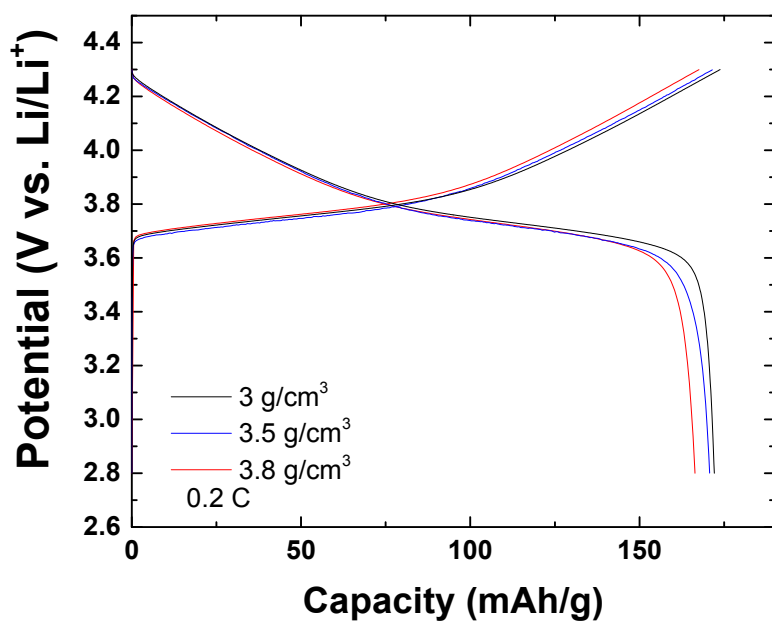

Fig. S5 The effect of the tap density of the MW-CNT/NCM523 composite electrodes on the galvanostatic charge–discharge characteristics.

Table. S1 Compositions of the prepared cathode materials.

| Electrode     | Active materials | Conductive agents | Binder                        |
|---------------|------------------|-------------------|-------------------------------|
|               | NCM523 (wt%)     | CNT (wt%)         | PAA in H <sub>2</sub> O (wt%) |
| CNT/NCM95-PAA | 95               | 2                 | 3                             |
| CNT/NCM95     | 95               | 5                 | .                             |
| CNT/NCM97     | 97               | 3                 | .                             |
| CNT/NCM98     | 98               | 2                 | .                             |
| AB/NCM        | 90               | 5 wt% AB          | 5 wt% (PVDF in NMP)           |

Tabl2. S2 Loading and tap density of the prepared cathodes.

| Electrode     | Loading density (mg/cm <sup>2</sup> ) | Tap density (g/cm <sup>3</sup> ) |
|---------------|---------------------------------------|----------------------------------|
| CNT/NCM95-PAA | 3.96                                  | 3.07                             |
| CNT/NCM95     | 4.27                                  | 3.05                             |
| CNT/NCM97     | 4.29                                  | 3.11                             |
| CNT/NCM98     | 4.18                                  | 3.05                             |
| AB/NCM        | 3.85                                  | 2.82                             |

Table. S3 Electrical resistivity of the MW-CNT/NCM523 composite electrodes and ABs/NCM523 electrode.

|                    | AB/NCM | CNT/NCM95-PAA | CNT/NCM95 | CNT/NCM97 | CNT/NCM98 |
|--------------------|--------|---------------|-----------|-----------|-----------|
| Resistivity (Ω cm) | 8.21   | 4.72          | 1.18      | 1.39      | 1.48      |

Table. S4 Discharge capacity of the MW-CNT/NCM523 composite electrodes and ABs/NCM523 electrode.

|                                  | AB/NCM | CNT/NCM95-PAA | CNT/NCM95 | CNT/NCM97 | CNT/NCM98 |
|----------------------------------|--------|---------------|-----------|-----------|-----------|
| Capacity (m Ah g <sup>-1</sup> ) | 157.13 | 160.42        | 163.50    | 166.67    | 171.57    |

Table. S5 Interfacial electrical resistivity between the composite electrodes and Al current collector.

|                                                      | AB/NCM                         | CNT/NCM95-PAA                  | CNT/NCM95                      |
|------------------------------------------------------|--------------------------------|--------------------------------|--------------------------------|
| Interfacial resistivity<br>( $\Omega \text{ cm}^2$ ) | $6.08 \pm 0.58 \times 10^{-3}$ | $2.39 \pm 0.31 \times 10^{-3}$ | $7.57 \pm 0.63 \times 10^{-4}$ |

Table. S6 Kinetic parameters of the MW-CNT/NCM523 composite electrodes and AB/NCM523 electrode.

|           | $R_{\text{sf}}$ ( $\Omega$ ) | $R_{\text{ct}}$ ( $\Omega$ ) | $D_{\text{Li}}$ ( $\text{cm}^2 \text{ s}^{-1}$ ) |
|-----------|------------------------------|------------------------------|--------------------------------------------------|
| AB/NCM    | 18.83                        | 20.97                        | $2.55 \times 10^{-10}$                           |
| CNT/NCM95 | 11.37                        | 16.31                        | $2.68 \times 10^{-10}$                           |
| CNT/NCM97 | 13.74                        | 18.08                        | $2.44 \times 10^{-10}$                           |
| CNT/NCM98 | 15.77                        | 18.85                        | $2.20 \times 10^{-10}$                           |

Table. S7 Capacity retention of the MW-CNT/NCM523 composite electrodes and AB/NCM523 electrode after 300 cycles.

|                        | AB/NCM | CNT/NCM95-PAA | CNT/NCM95 | CNT/NCM97 | CNT/NCM98 | CNT/NCM95<br>w/o treatment |
|------------------------|--------|---------------|-----------|-----------|-----------|----------------------------|
| Capacity retention (%) | 65     | 21            | 74        | 69        | 67        | 63                         |
